# Supplementary material
Source: PubMed Central journal article supplement (PMC4492405)

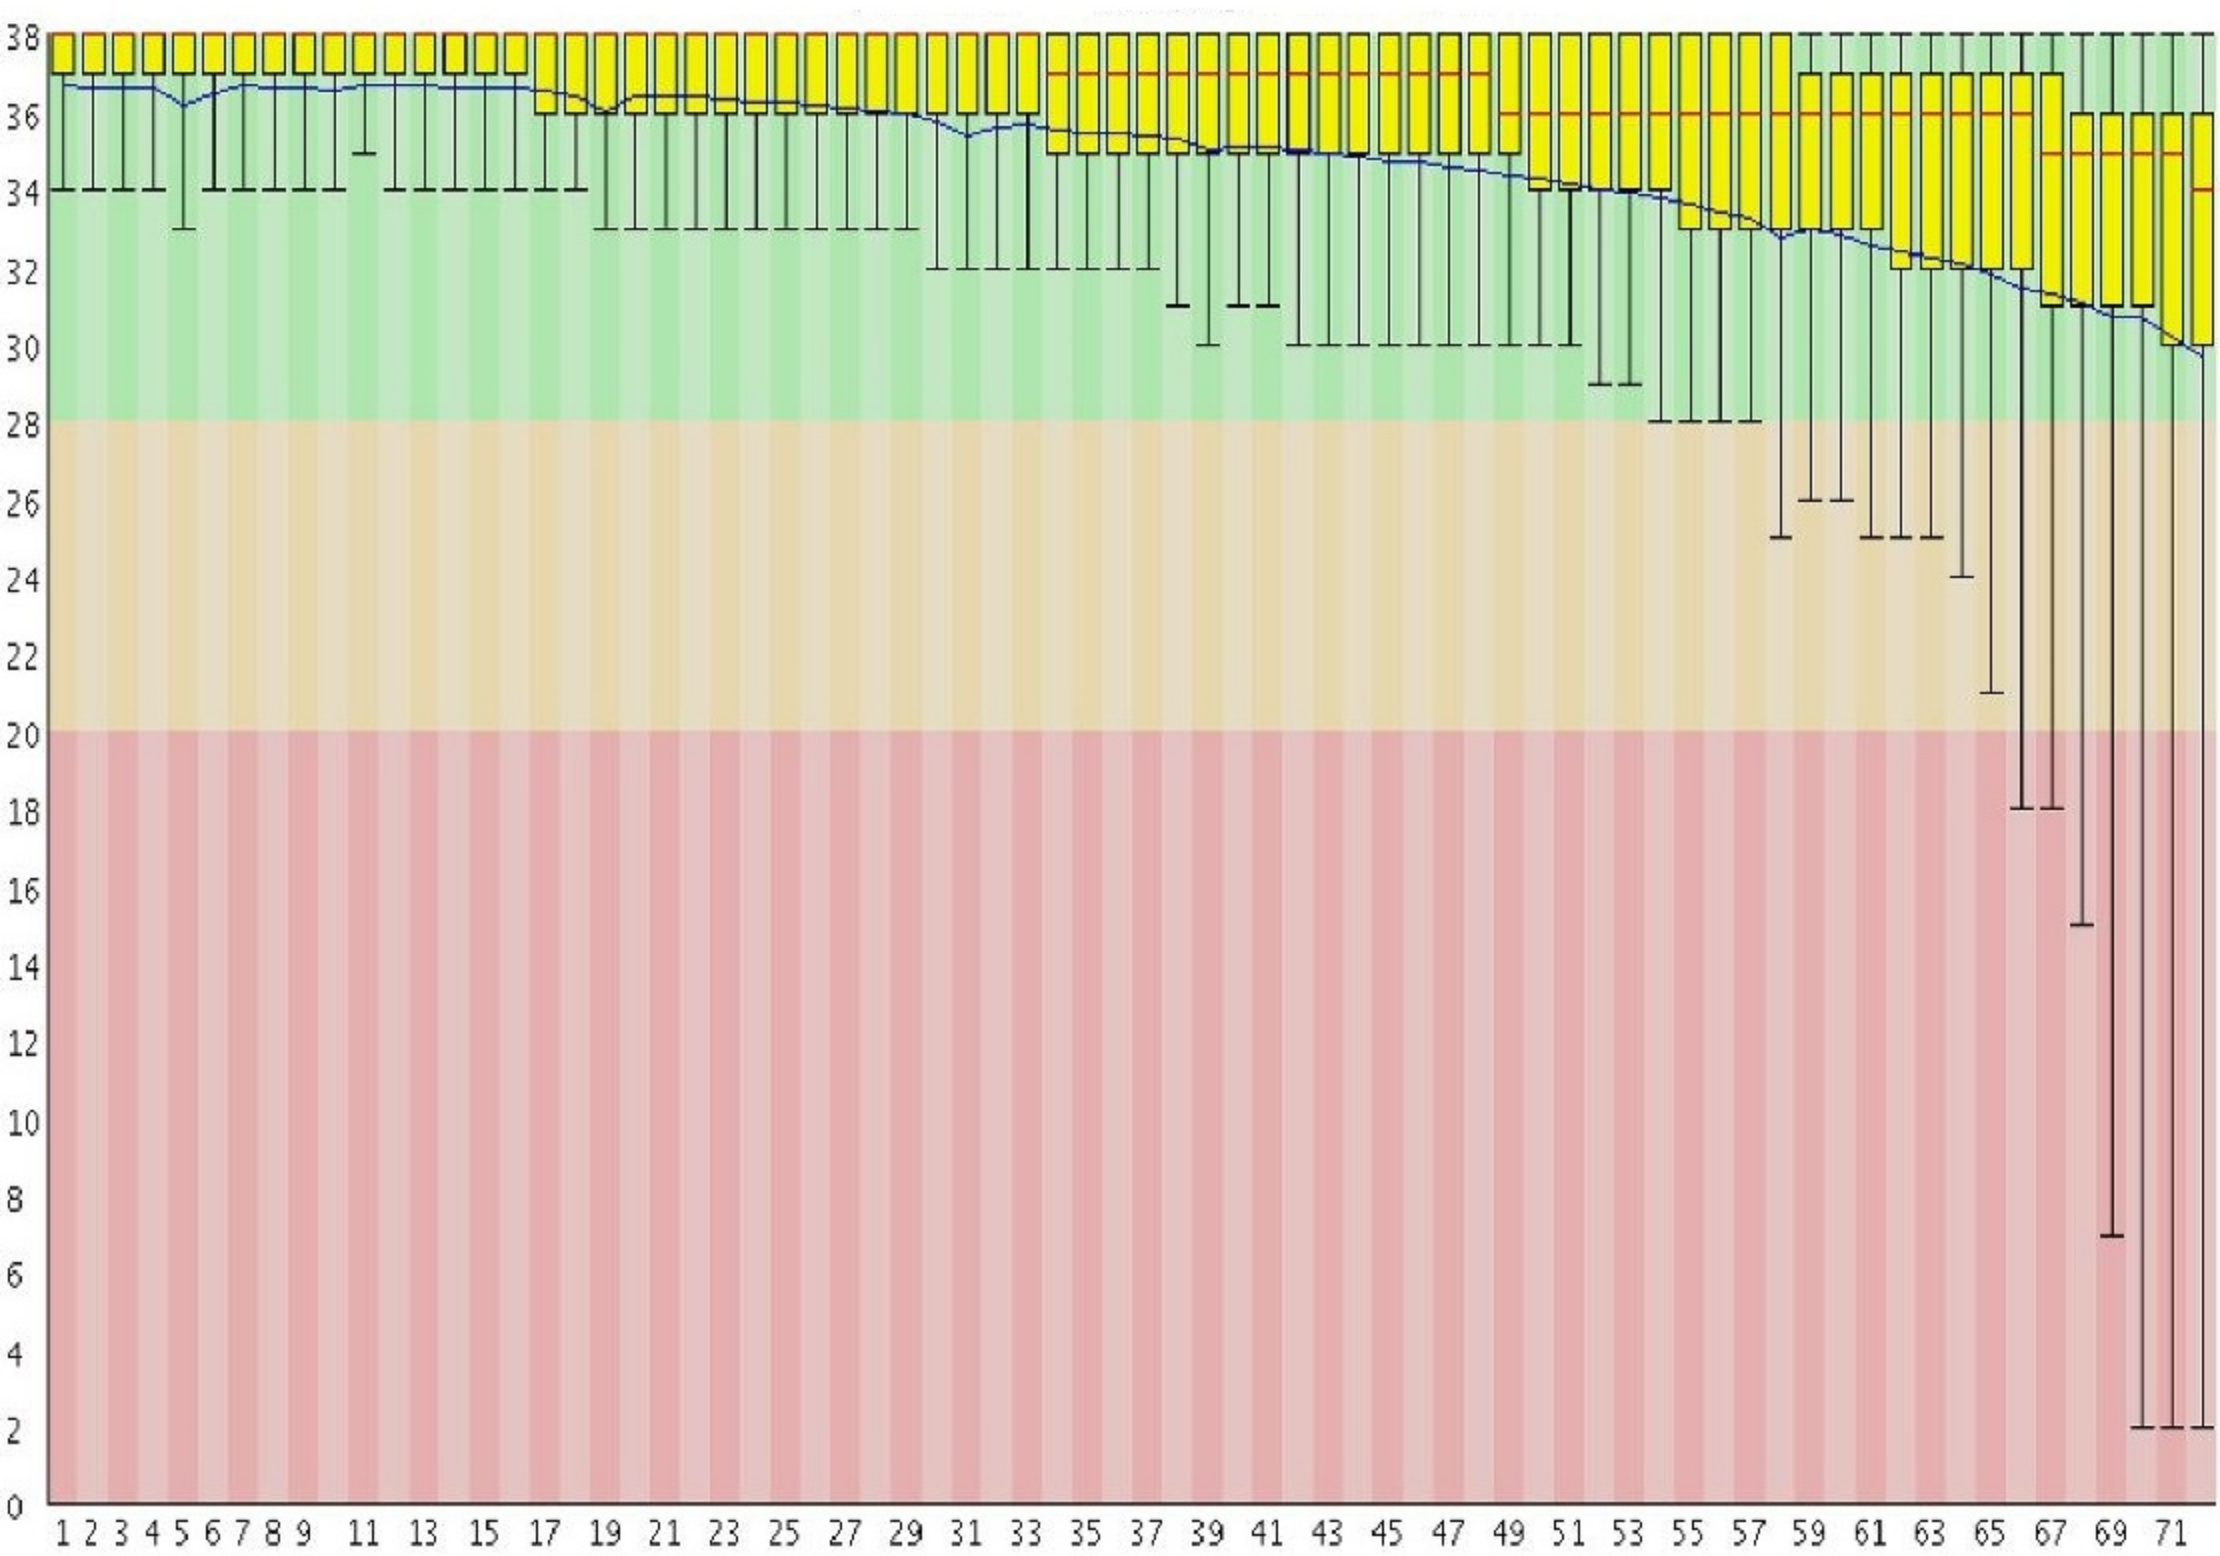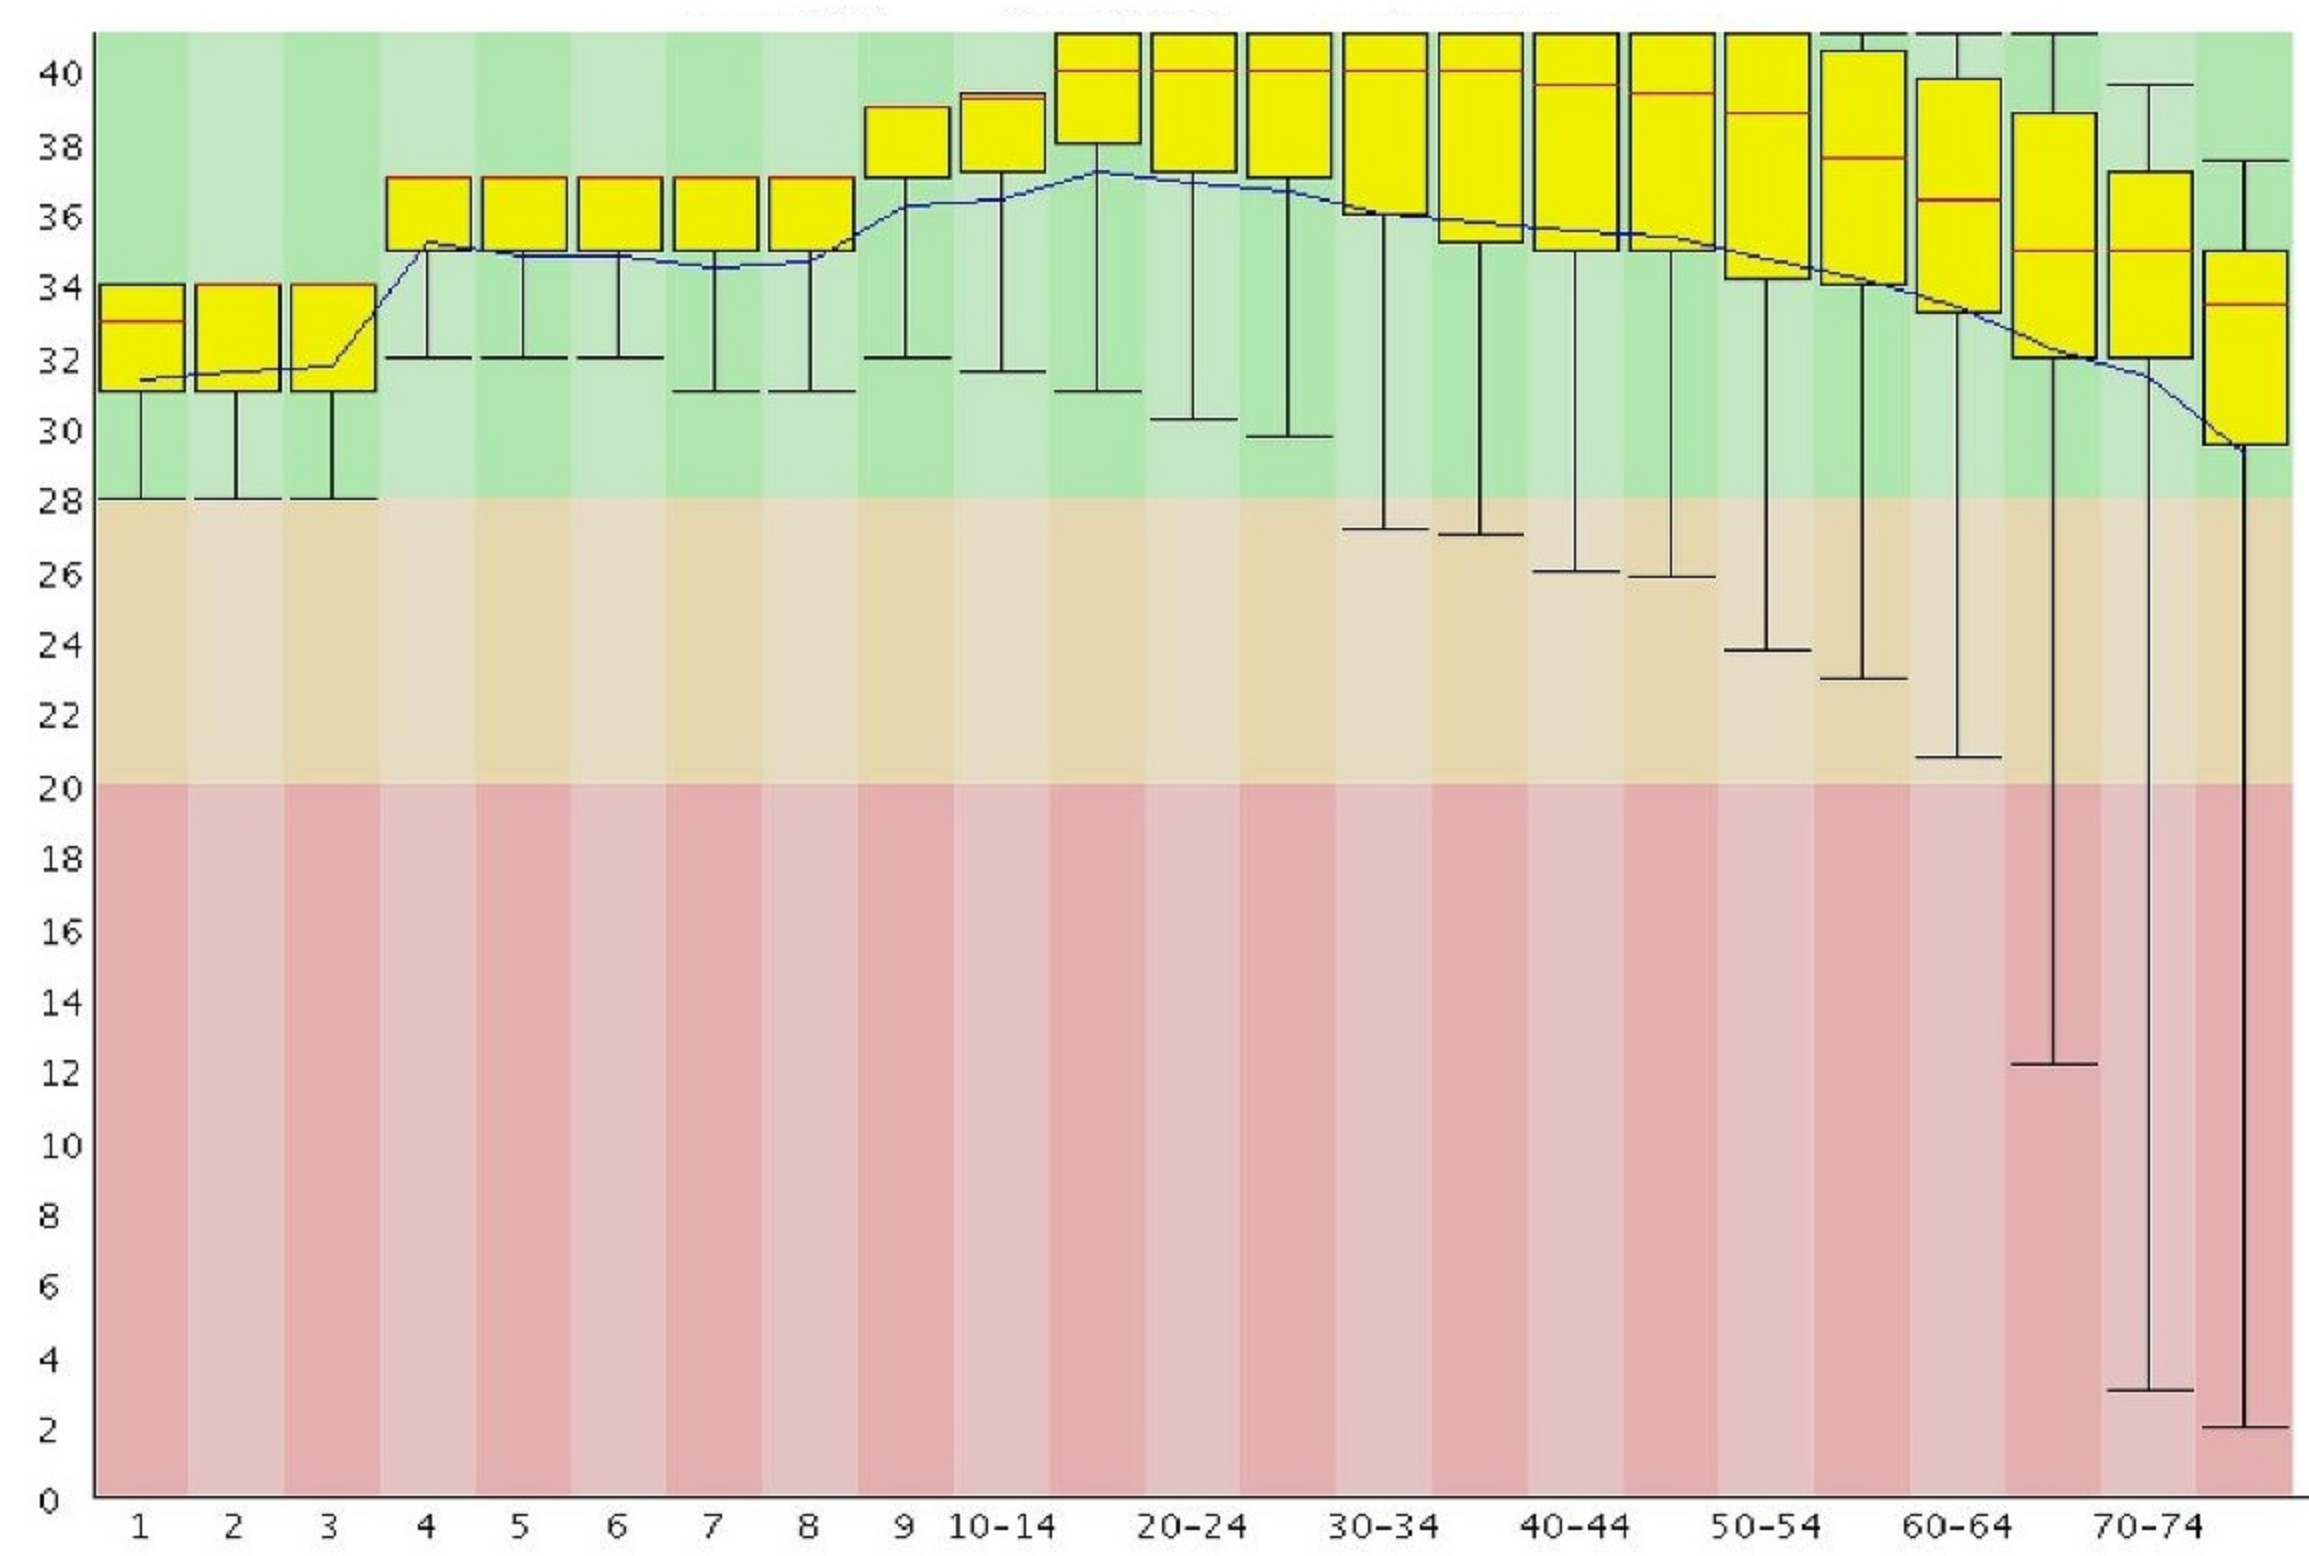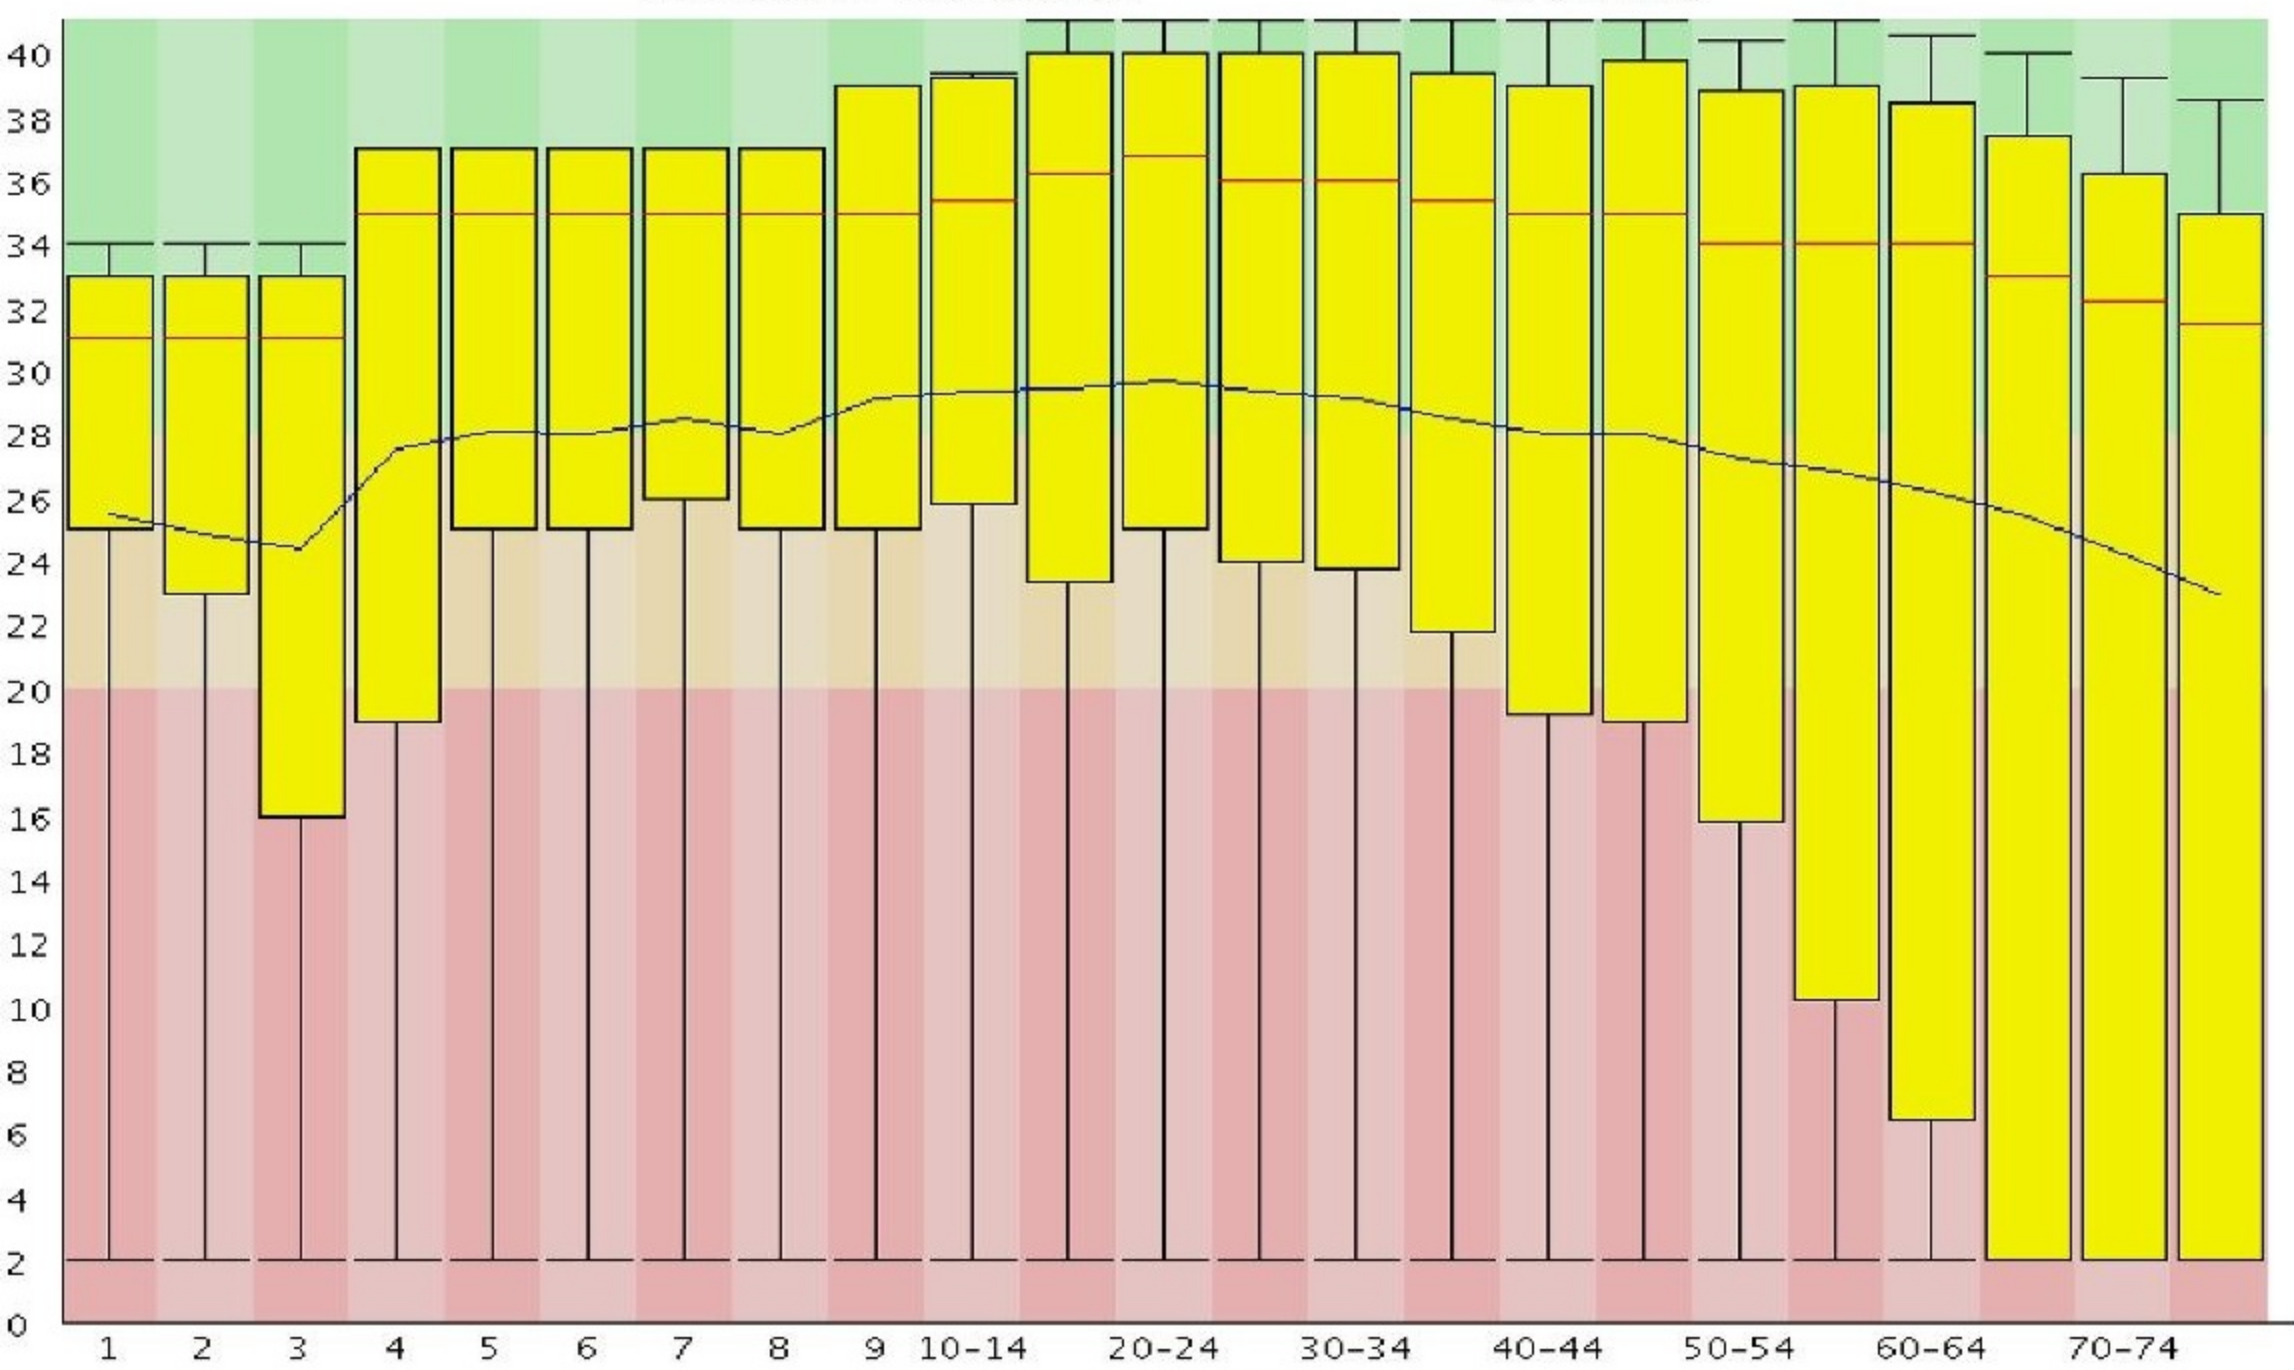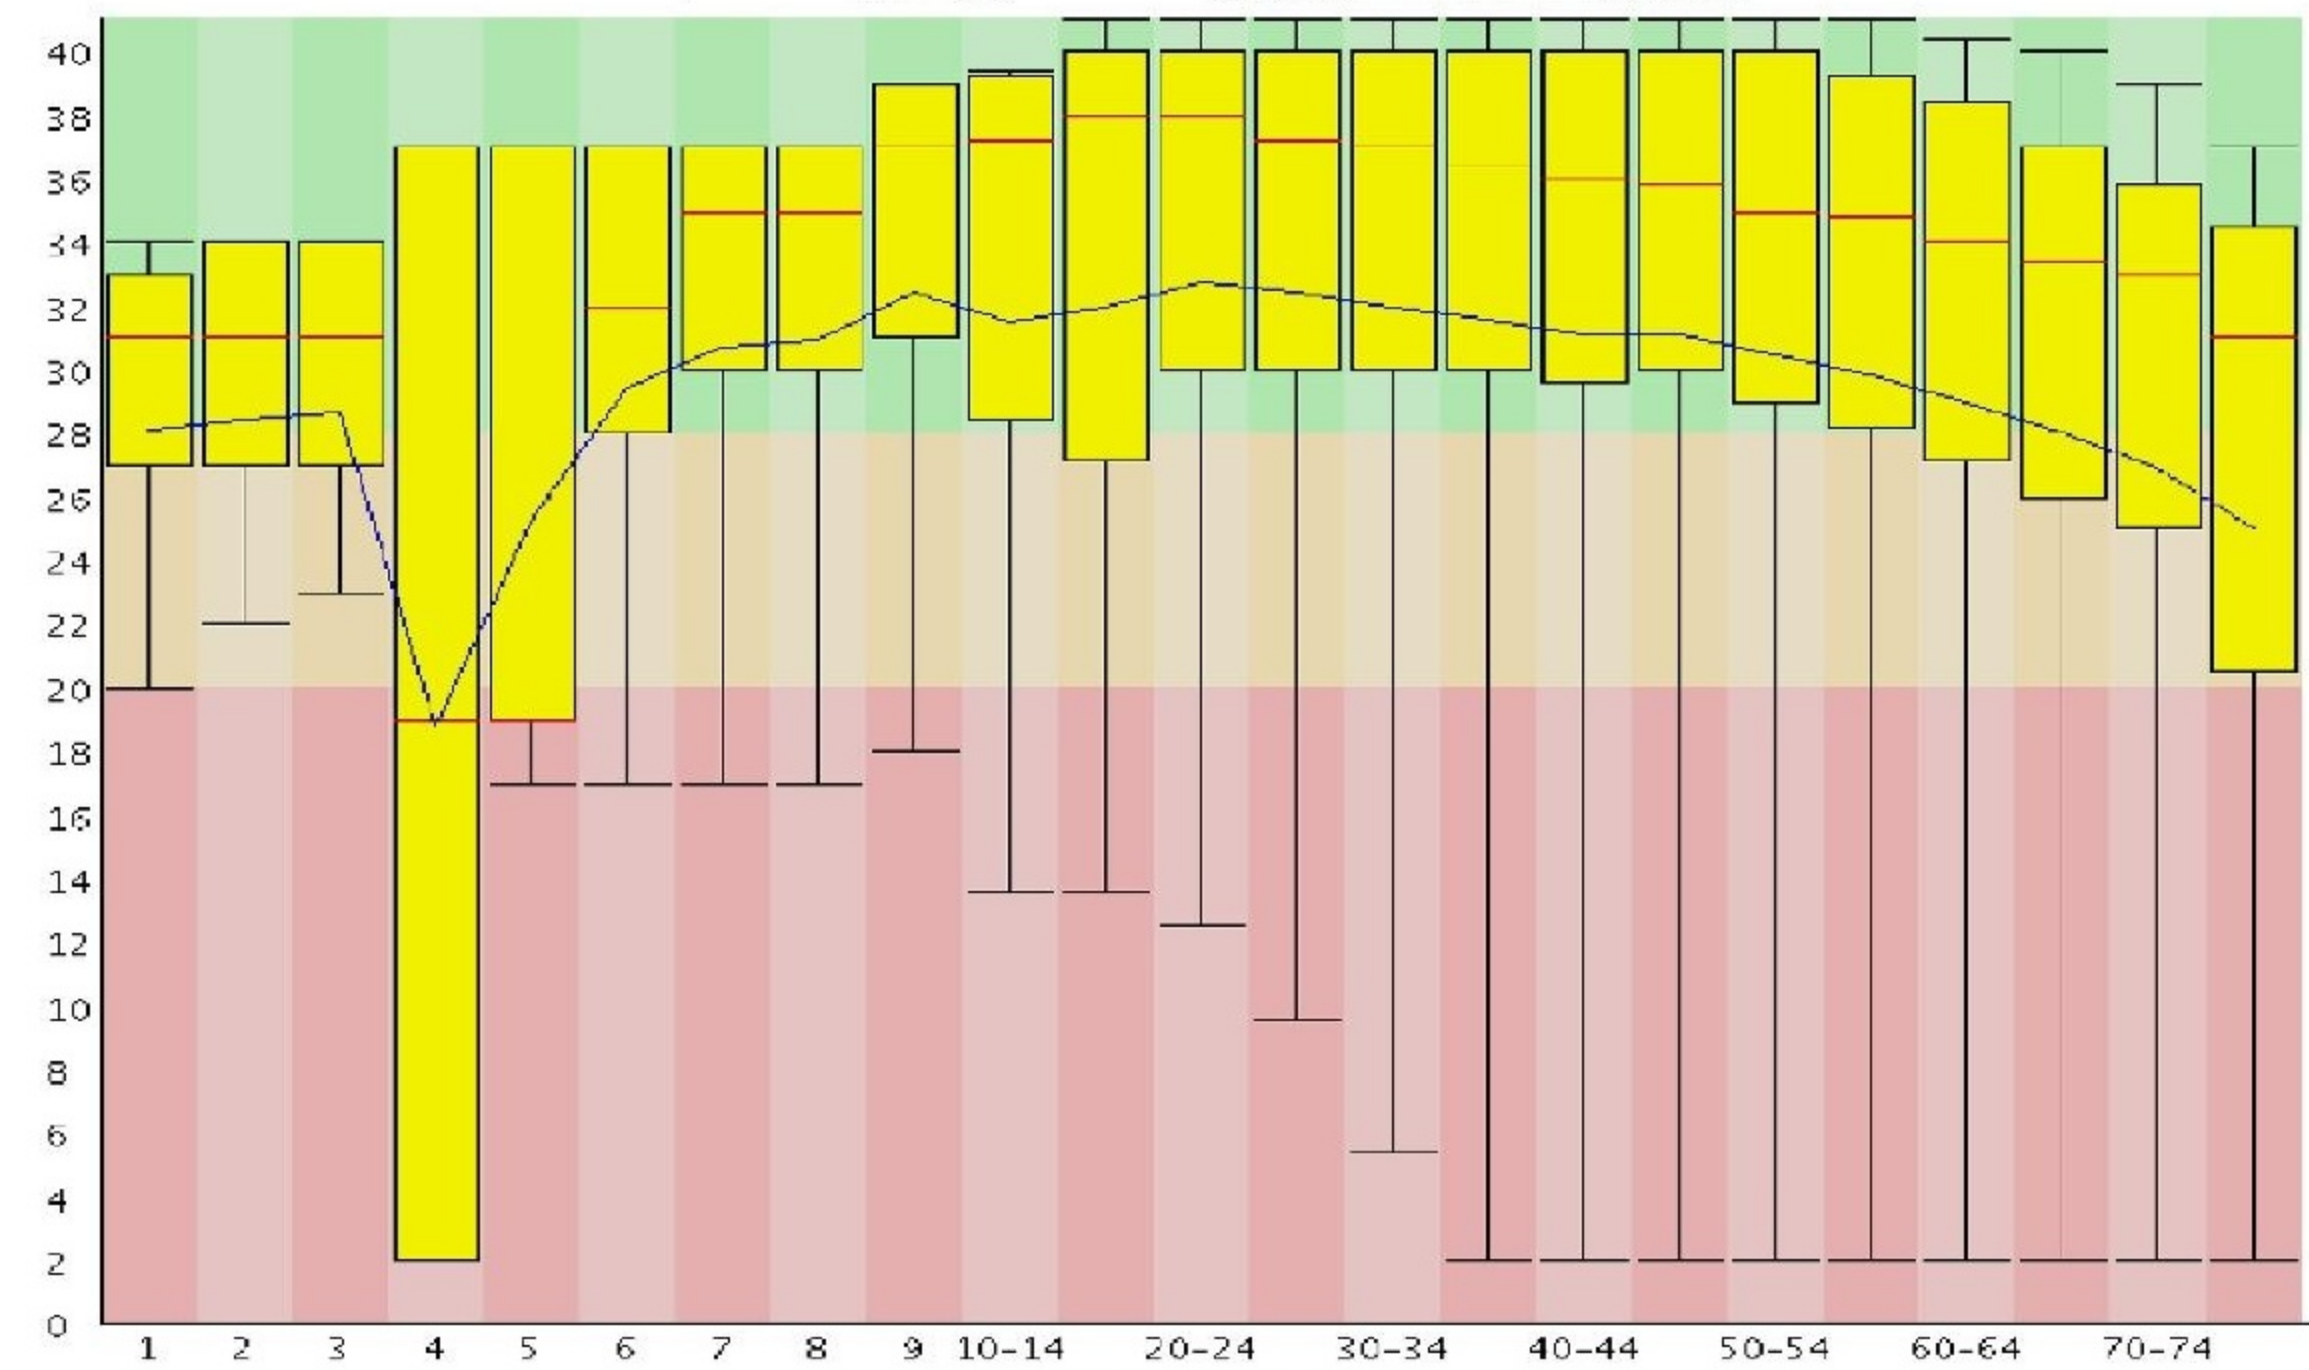

Supplement: supp_bbt069_FigureS1.pdf [file supp_bbt069_FigureS1.pdf]

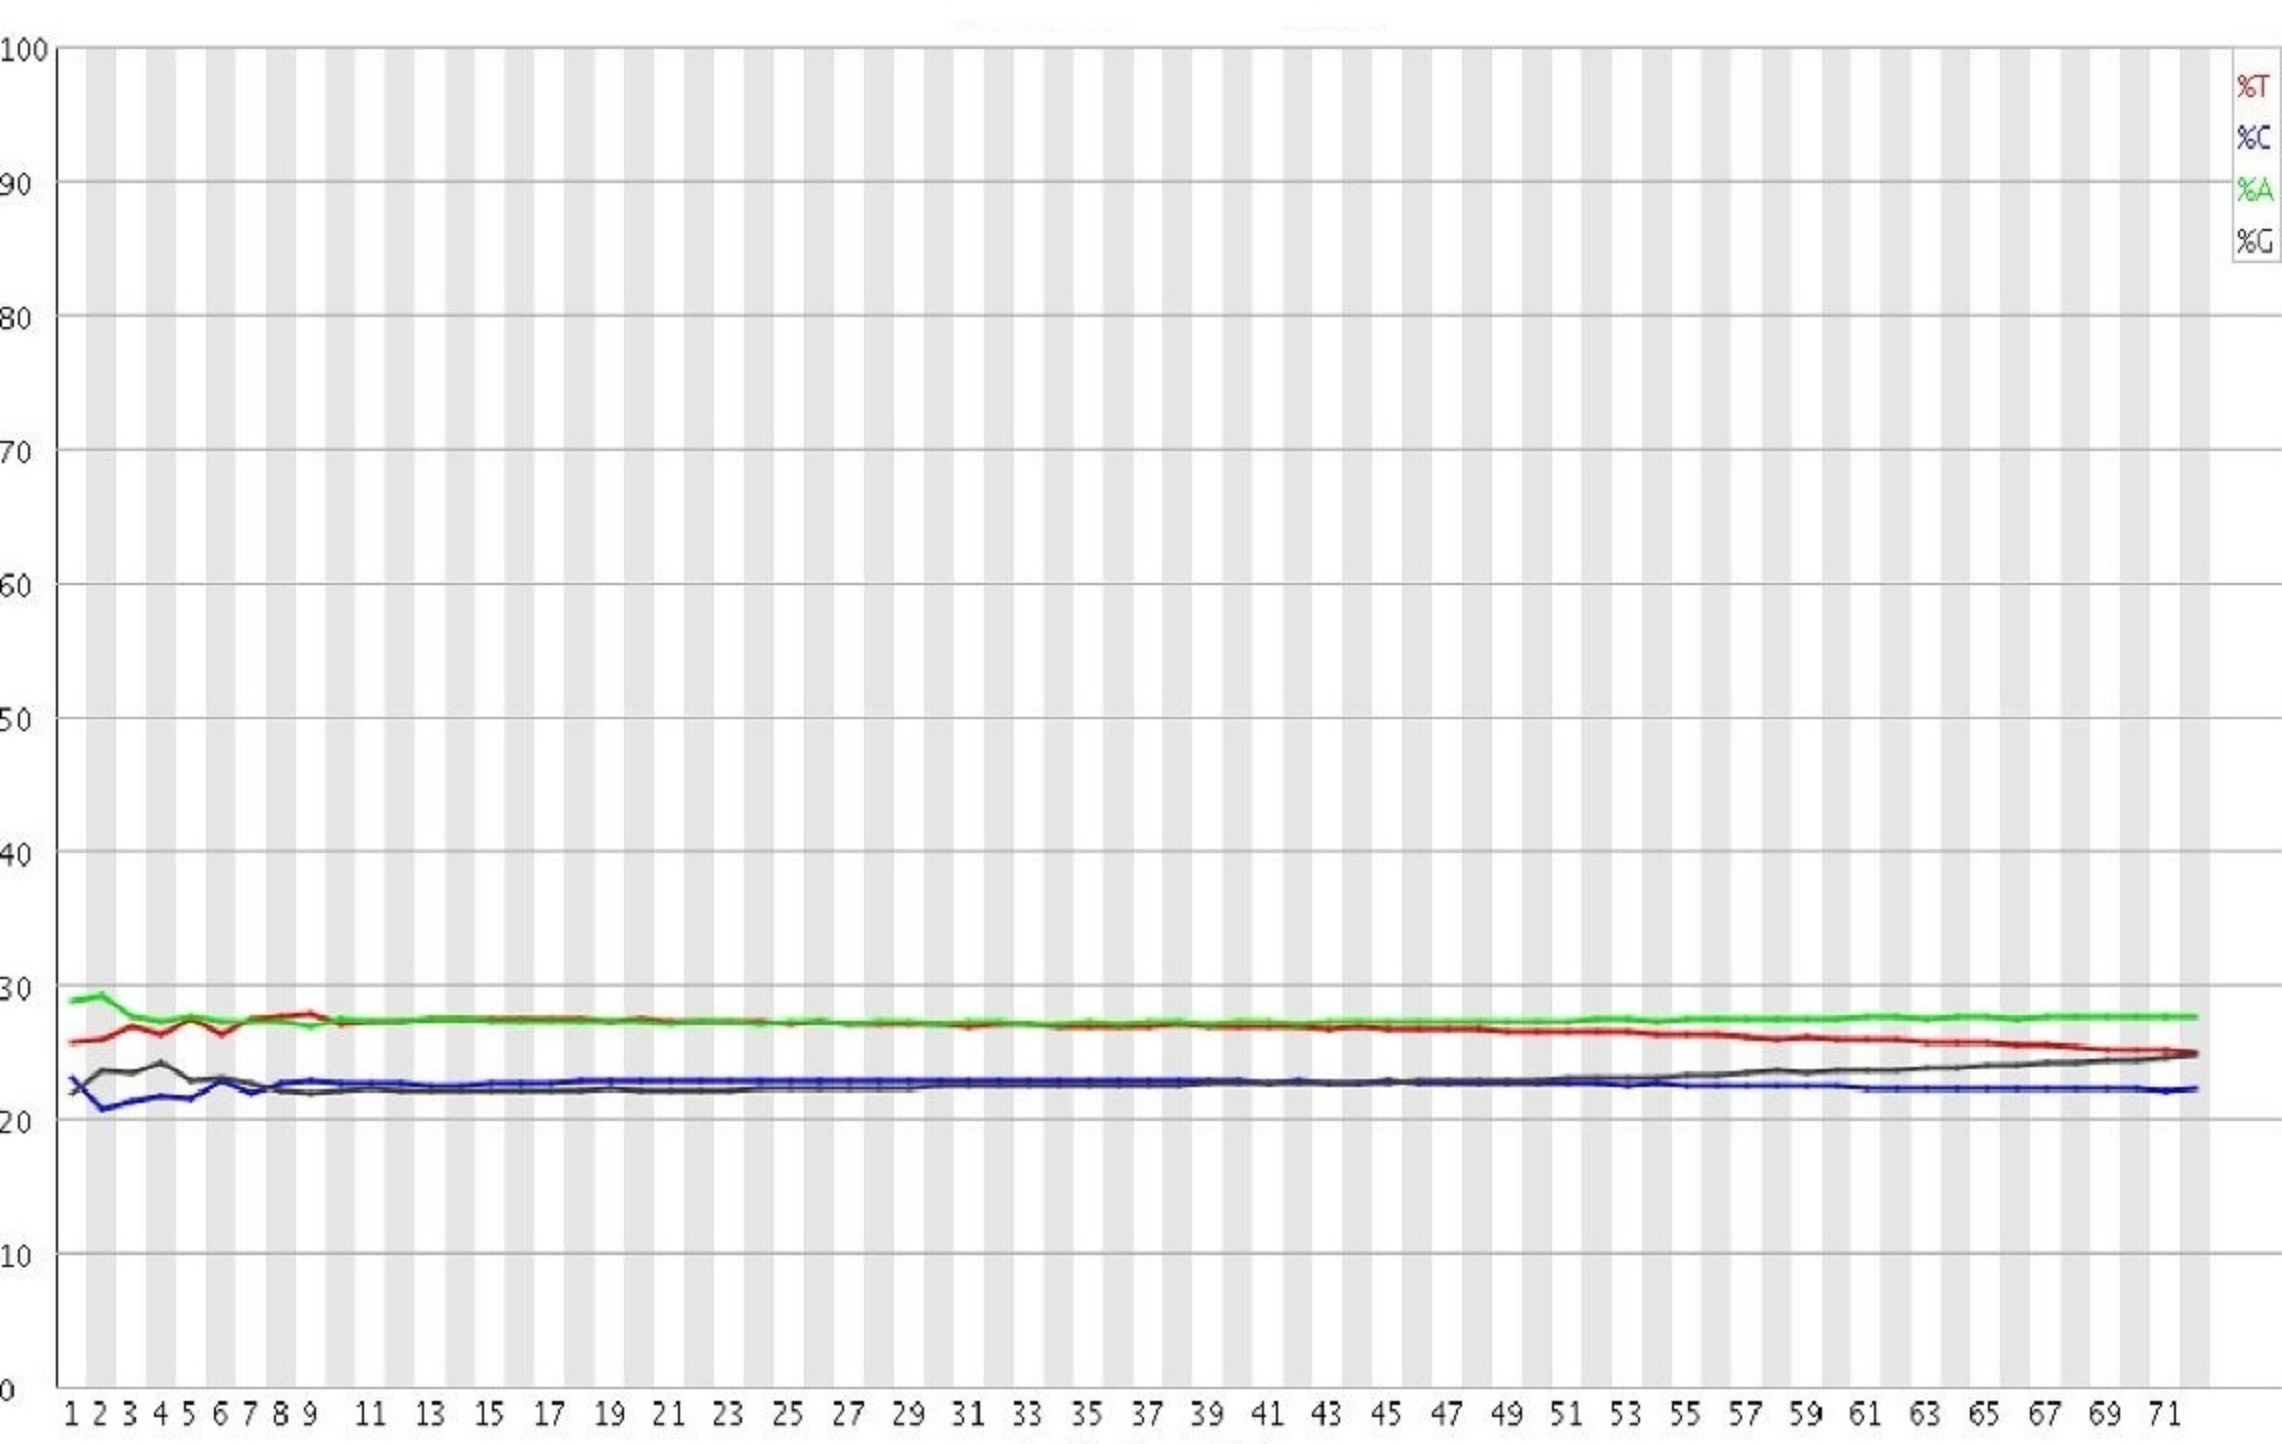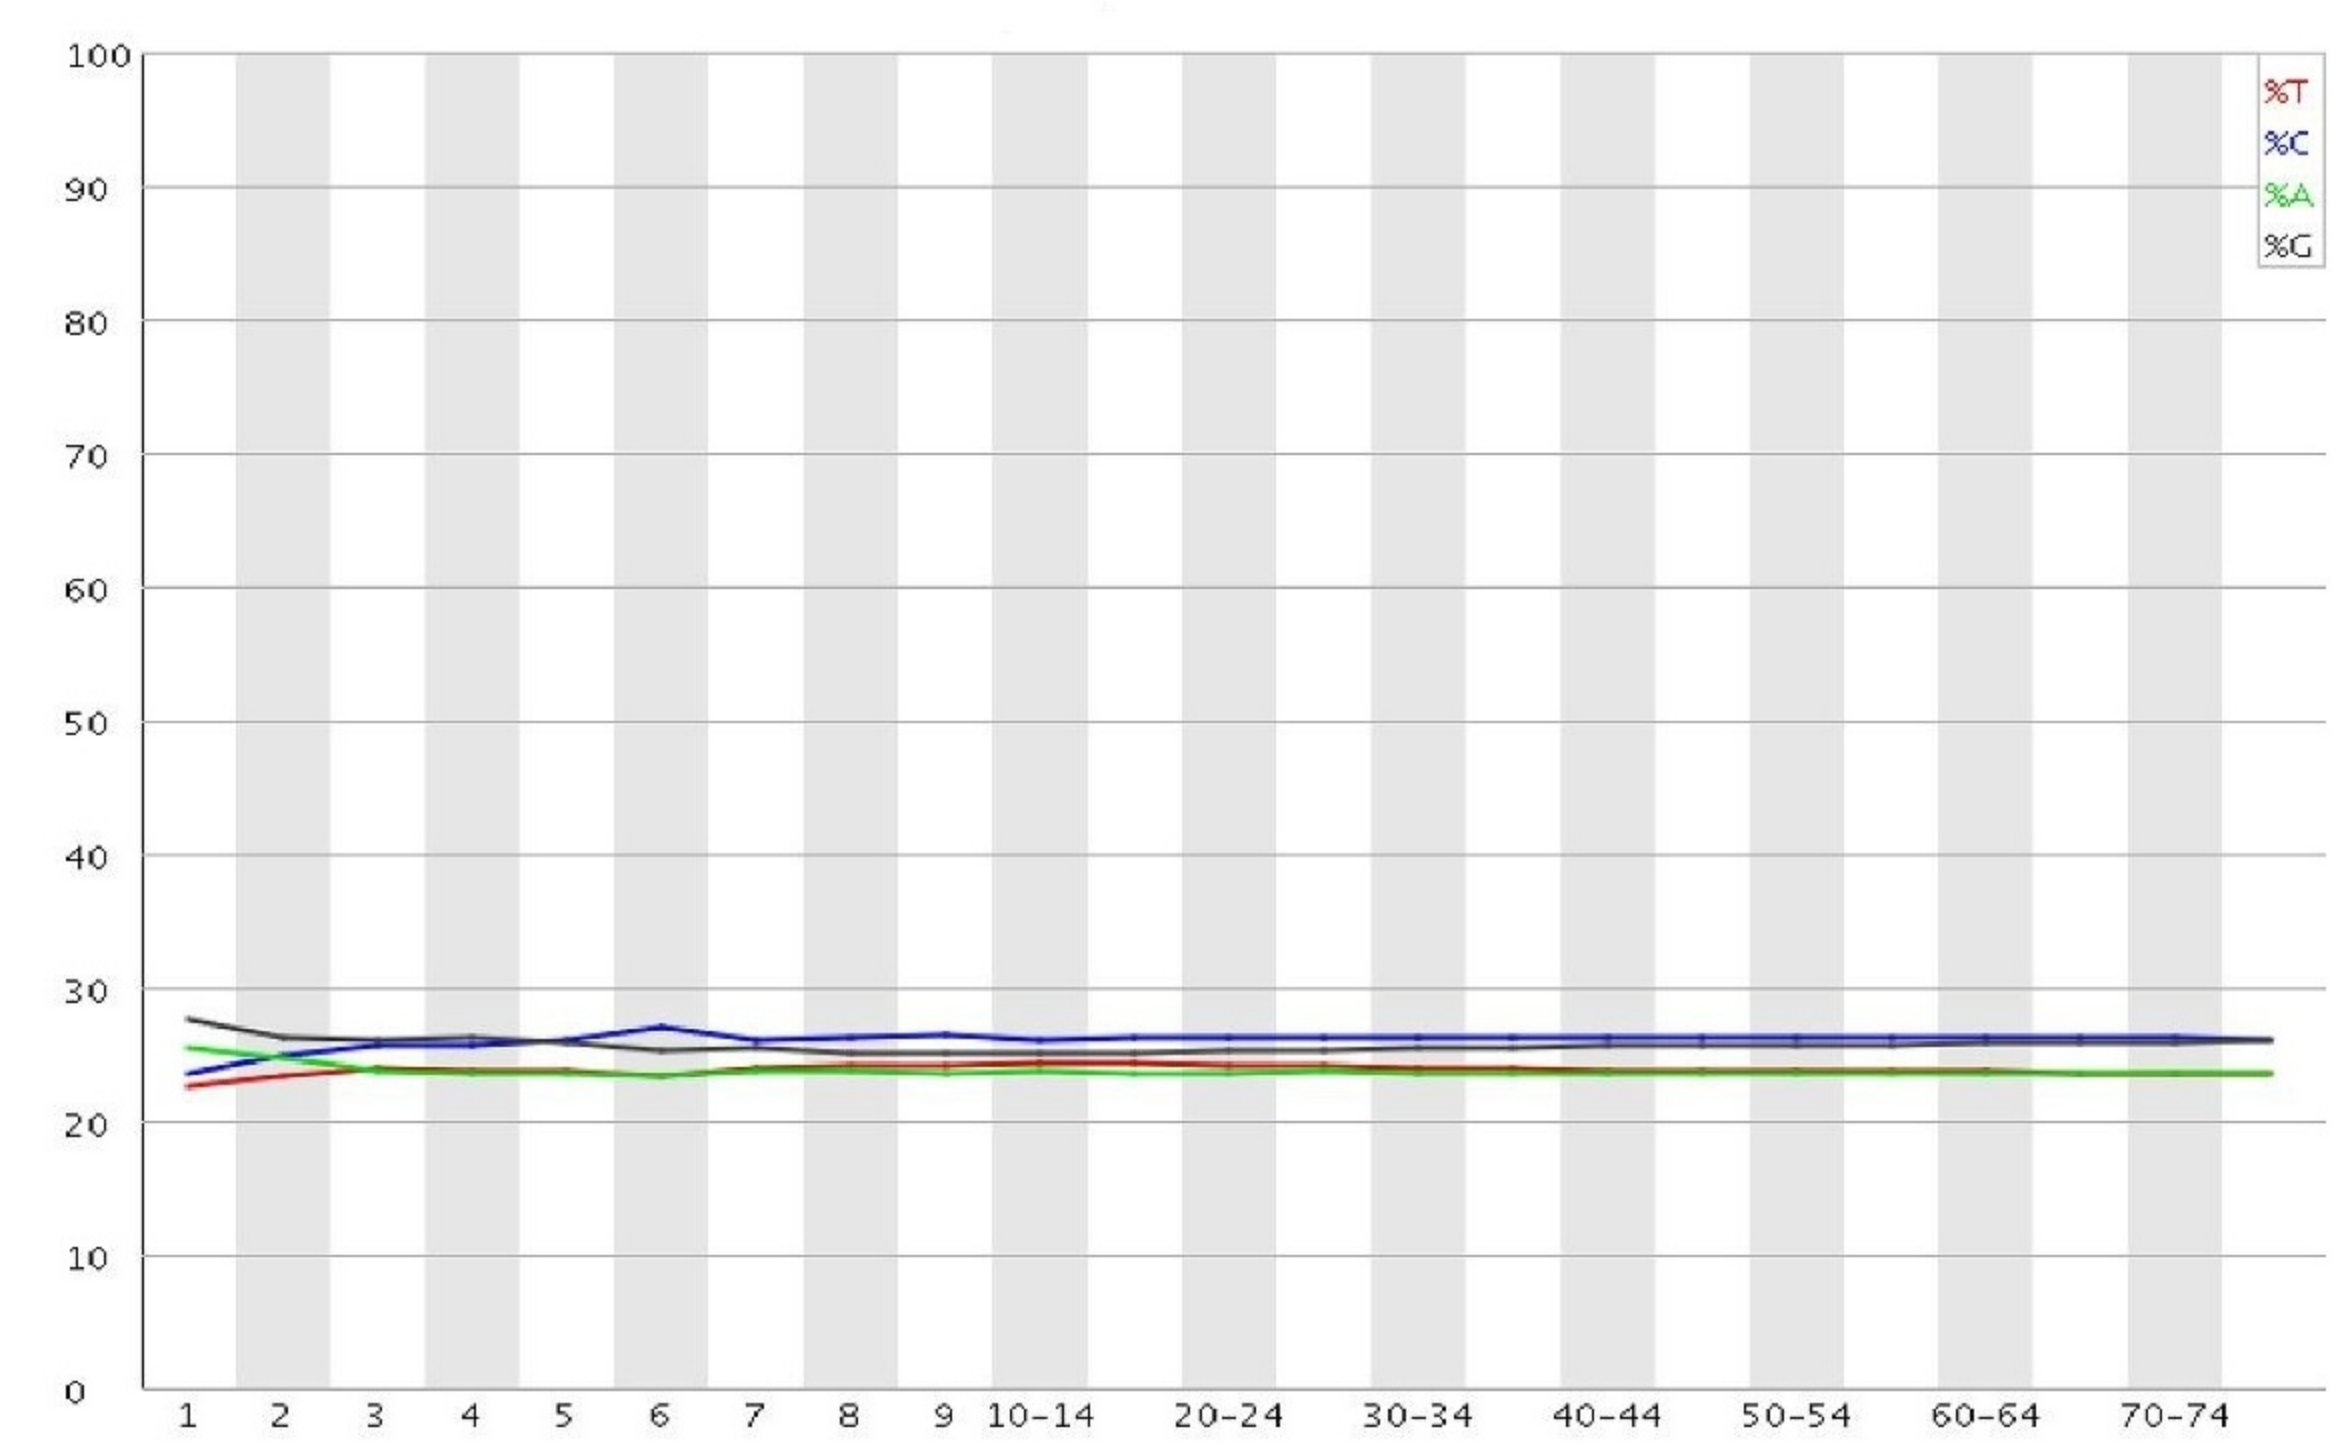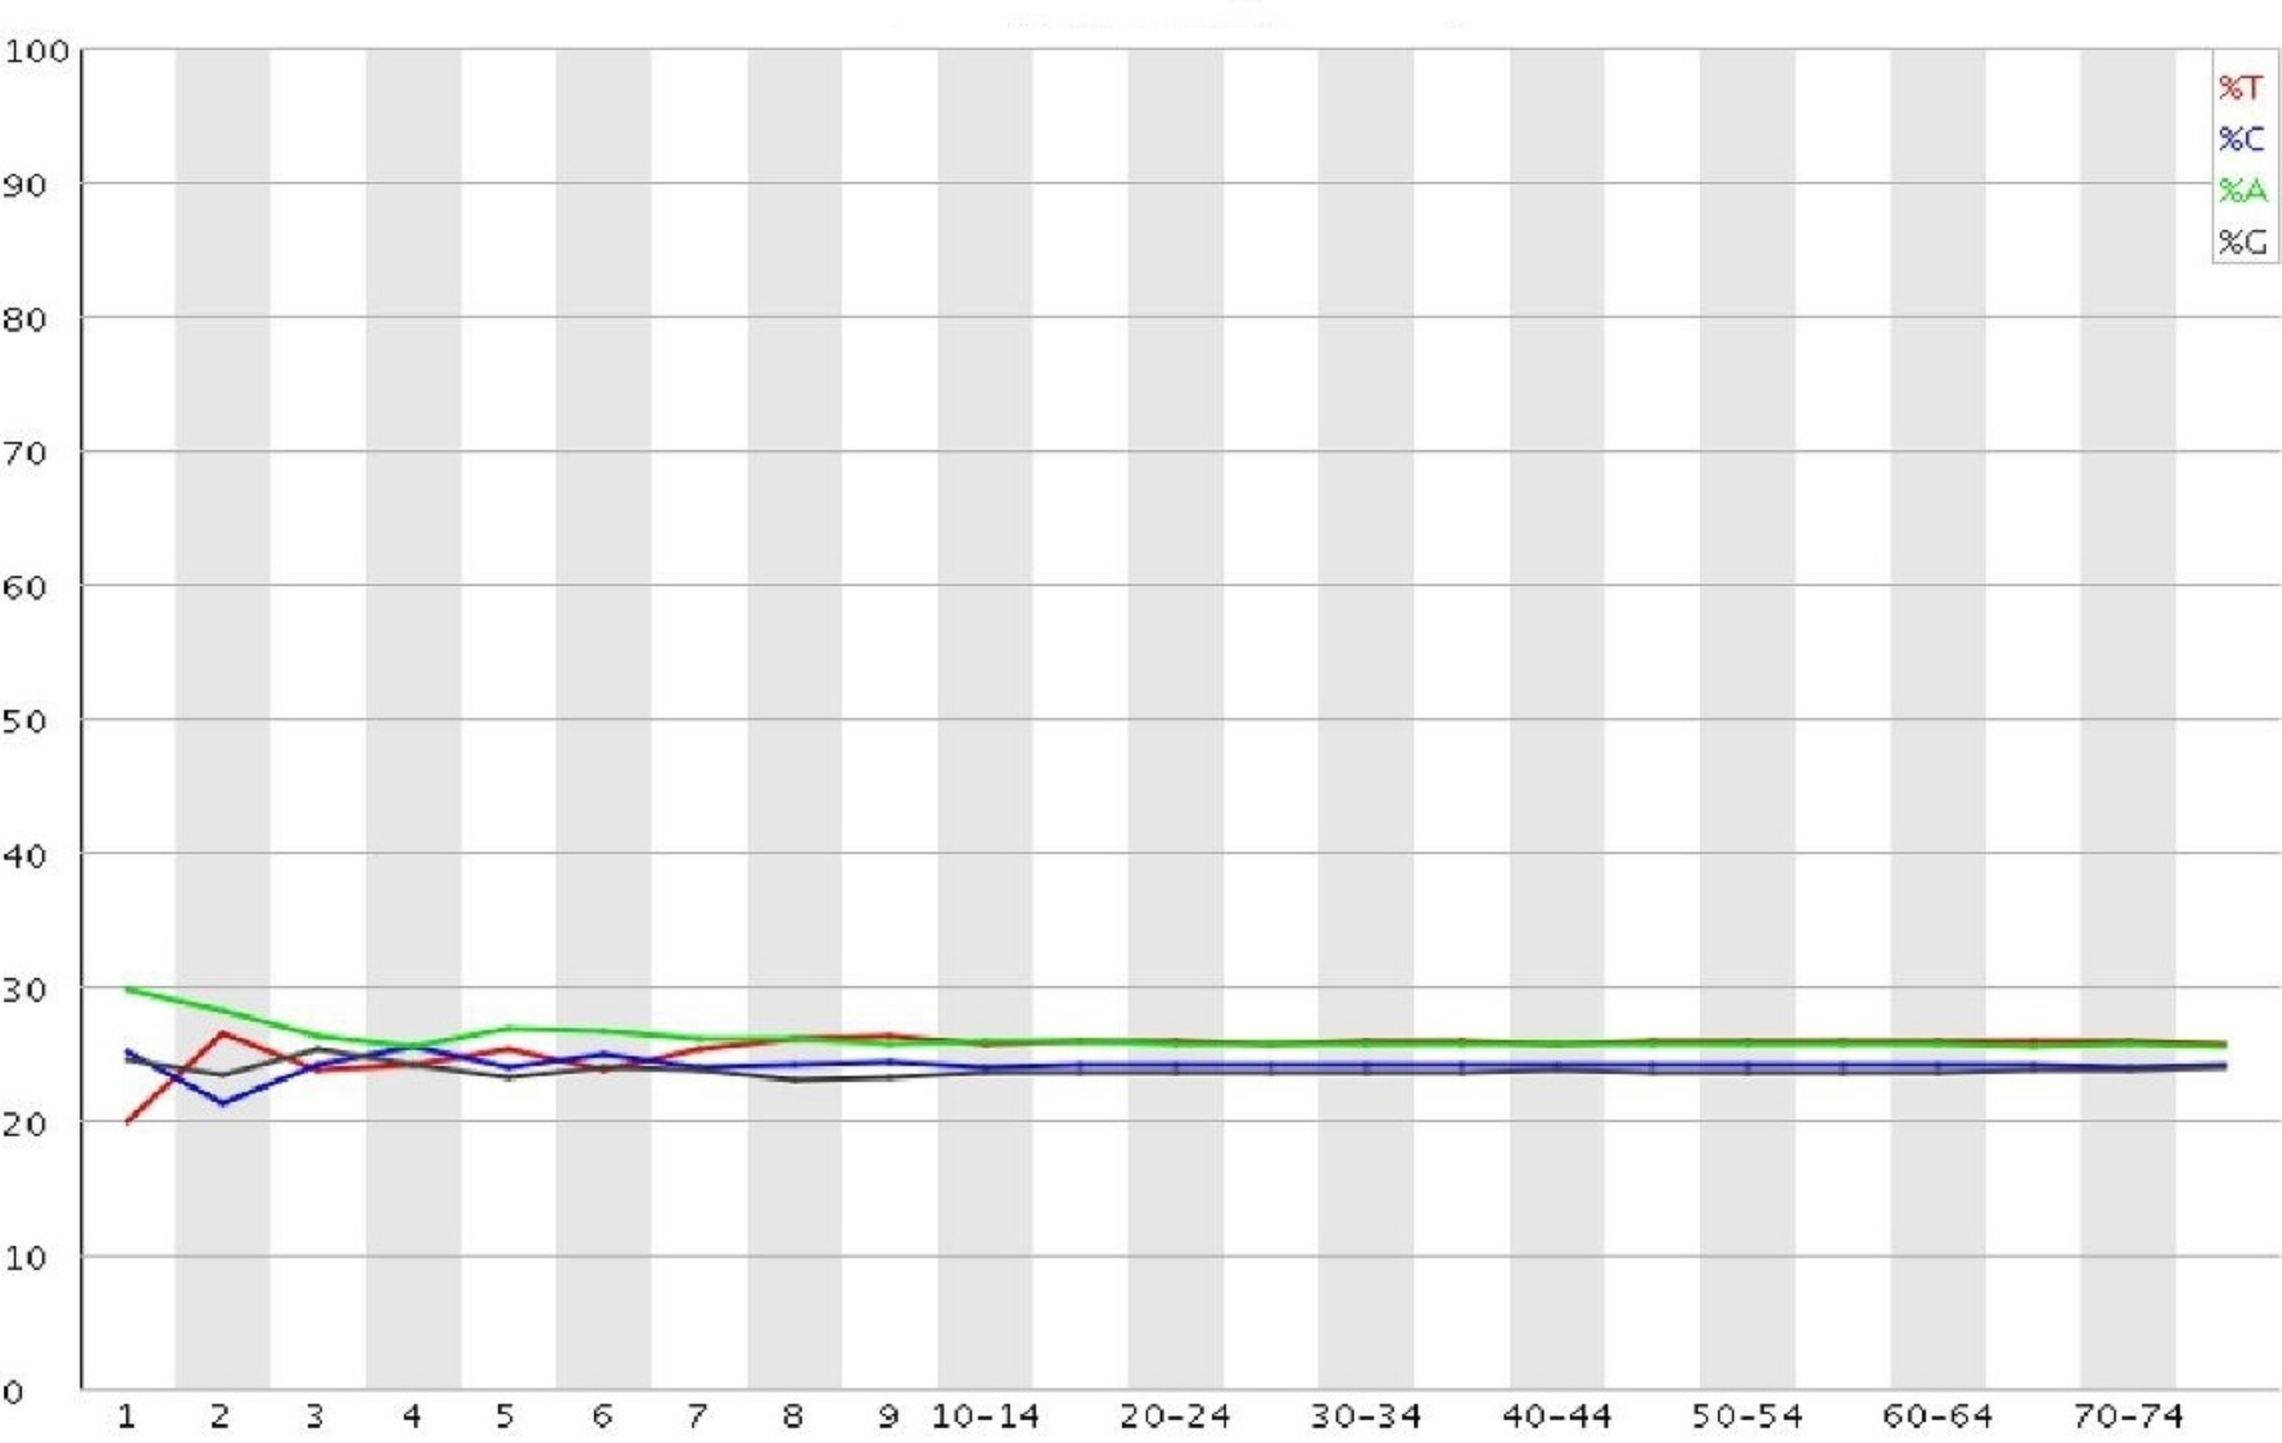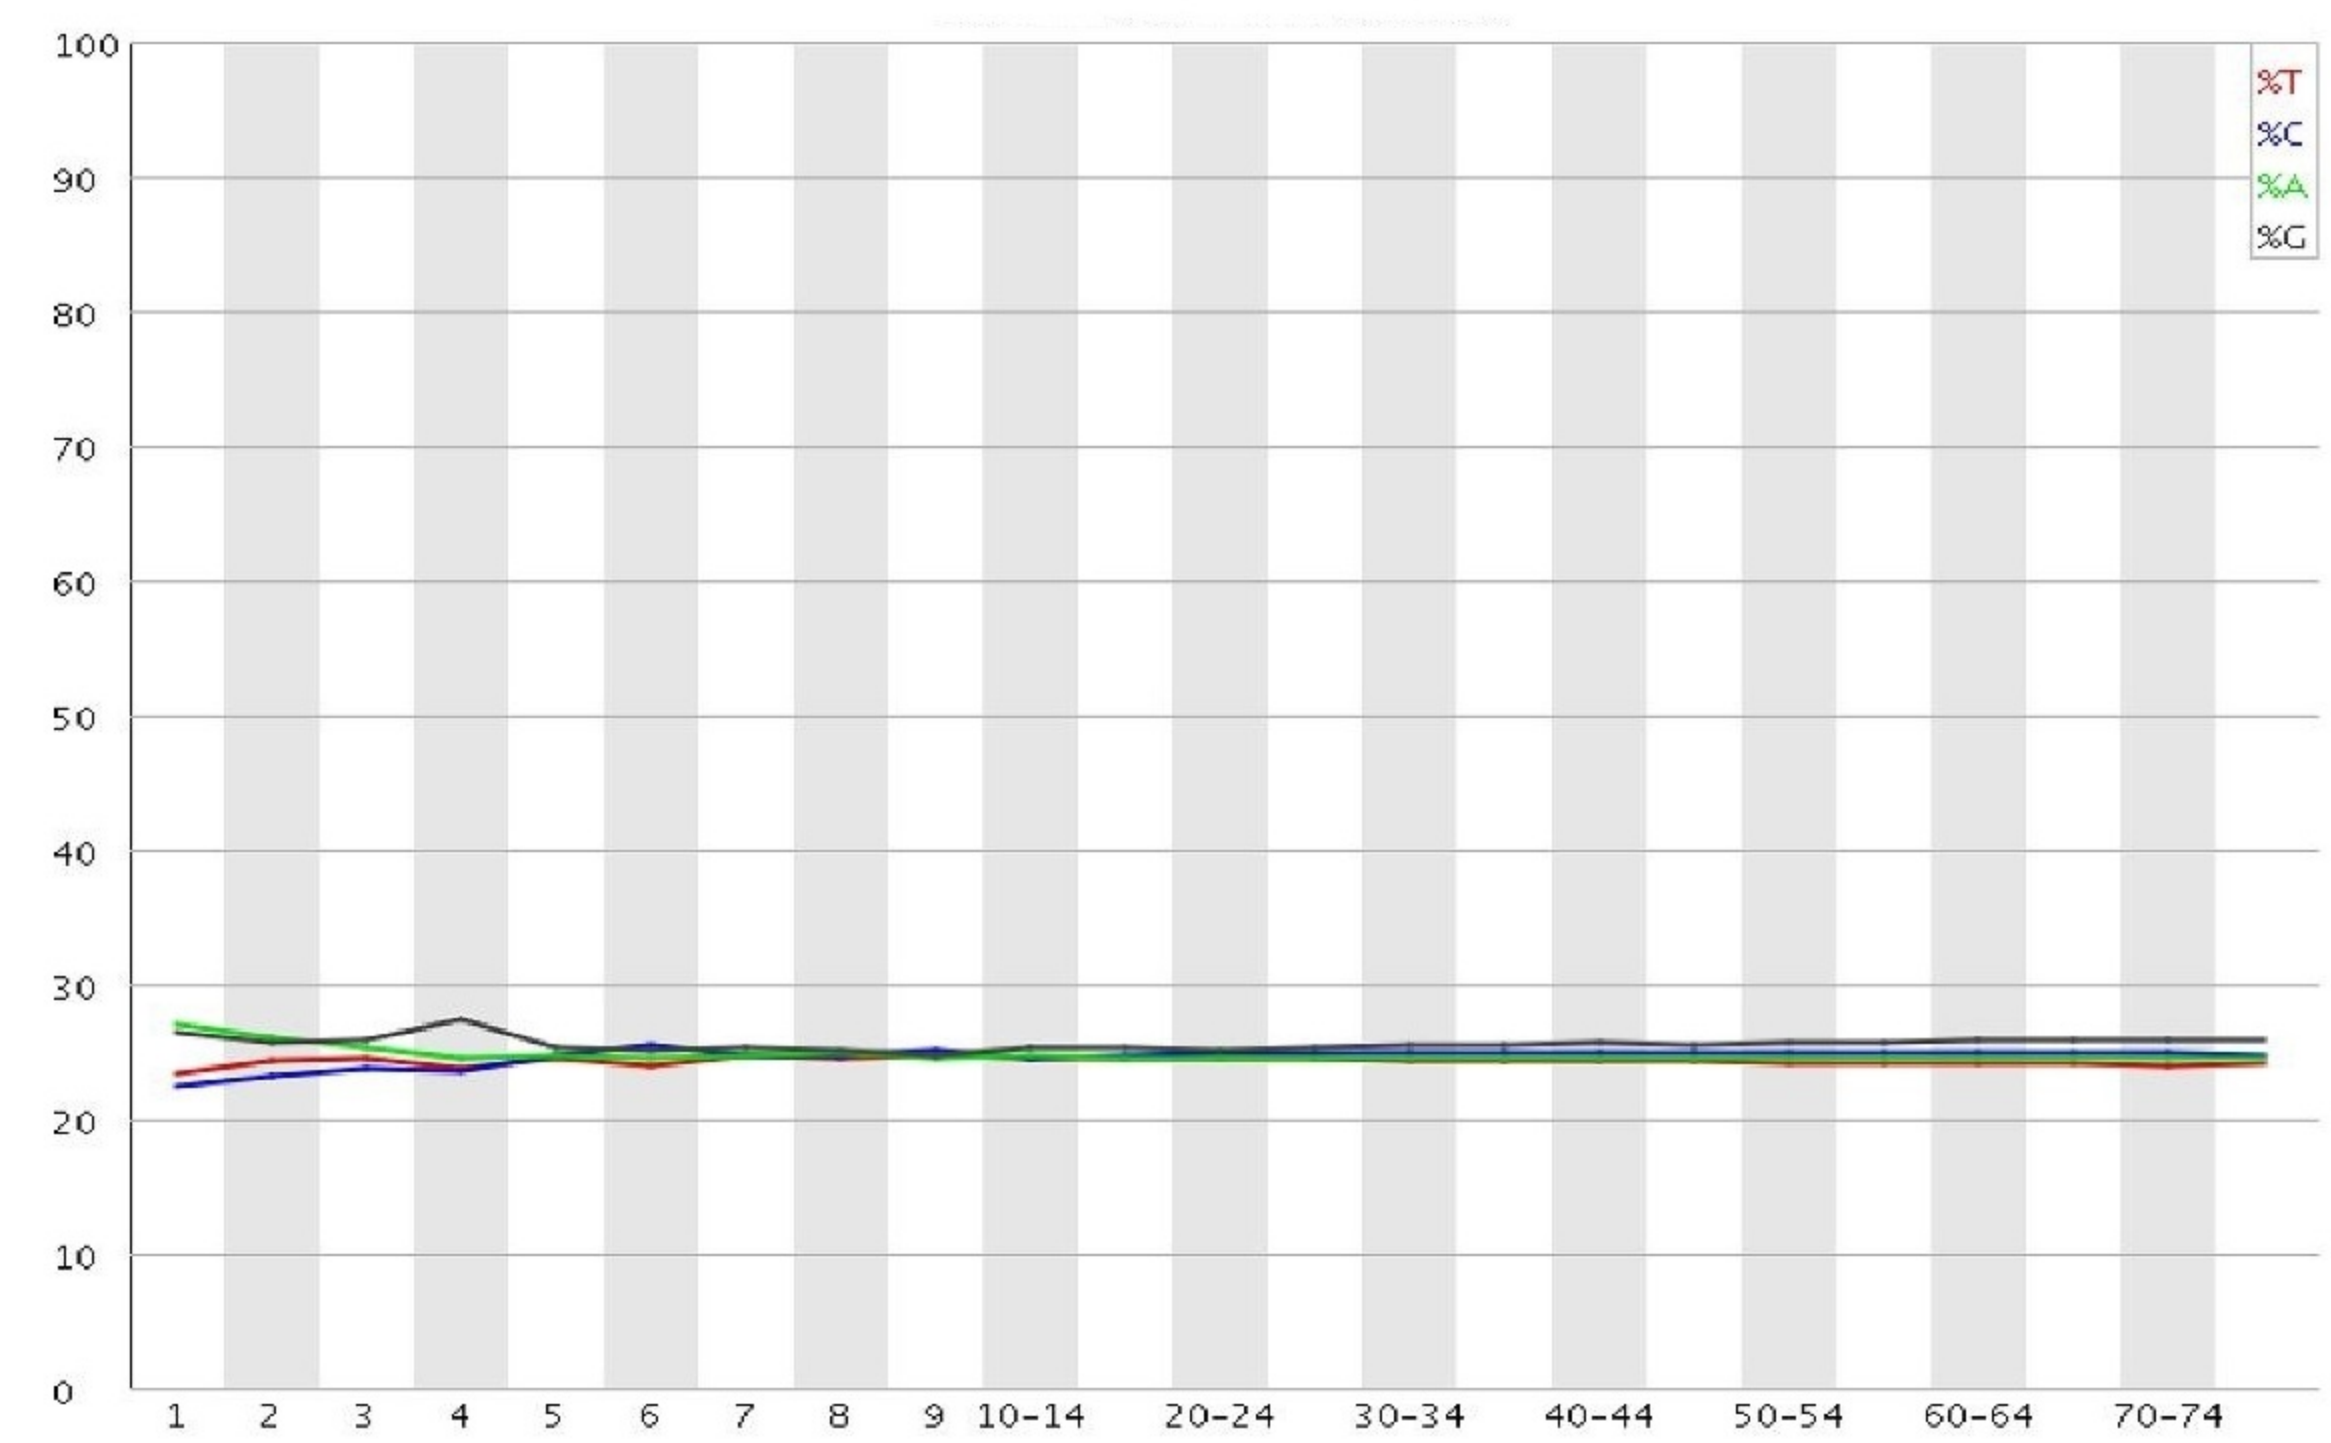

Supplement: supp_bbt069_FigureS2.pdf [file supp_bbt069_FigureS2.pdf]
